# Supplementary material
Source: HighWire-hosted journal article supplement (https://www.cmajopen.ca/highwire/filestream/80969/field_highwire_adjunct_files/1/open-2014-0075-2-at.pdf)

**Appendix 2 (as supplied by the authors): Level of comfort with glass slides compared to digital whole slide scans in examination settings**

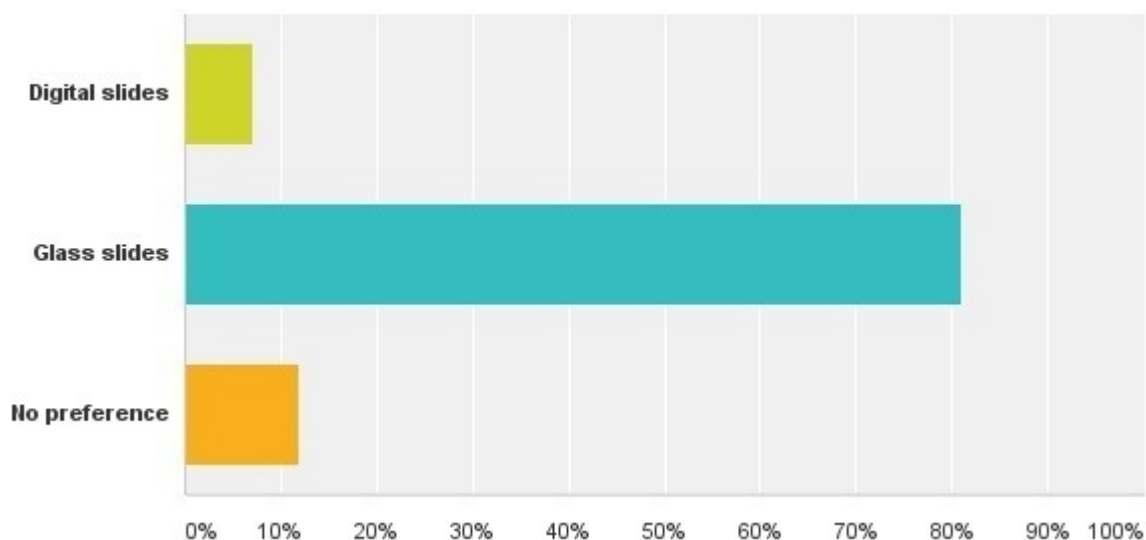

Supplement: open-2014-0075-2-at.pdf [file open-2014-0075-2-at.pdf]
